# Supplementary material for: Impact of iron fortification on the geospatial patterns of malaria and non-malaria infection risk among young children: a secondary spatial analysis of clinical trial data from Ghana
Source: PubMed Central journal article supplement — BMJ Open. 2017 Jun 6;7(5):e013192. doi: 10.1136/bmjopen-2016-013192 (PMC5734205; doi:10.1136/bmjopen-2016-013192), 2017-06-06
Supplement: bmjopen-2016-013192supp002.pdf [file bmjopen-2016-013192supp002.pdf]

**Table S1: Geo-spatial and non-spatial risk factors of endline infection status<sup>1</sup> among Ghanaian children in the *No-iron* group (Brong-Ahafo Region, Sept-Nov 2010)**

| Covariates                                                  | Estimate (95% CrI)<br>on the exponential<br>scale <sup>2</sup> |                 | Range<br>parameter<br>in km<br>(95% CrI) | Standard deviations<br>of random effects<br>(95% CrI) |          |
|-------------------------------------------------------------|----------------------------------------------------------------|-----------------|------------------------------------------|-------------------------------------------------------|----------|
|                                                             |                                                                |                 |                                          | Spatial                                               | Compound |
| <b>Outcome 1: Inflammation and/or parasitaemia (n=894)</b>  |                                                                |                 |                                          |                                                       |          |
| Intercept                                                   | 0.550                                                          | (0.298, 1.034)  | 7.050                                    | 0.506                                                 | 0.008    |
| Age per month                                               |                                                                |                 | (2.016,                                  | (0.271,                                               | (0.004,  |
| 6-23 months                                                 | 1.004                                                          | (0.975, 1.035)  | 18.26)                                   | 0.979)                                                | 0.030)   |
| 24-35 months                                                | 1.018                                                          | (0.964, 1.074)  |                                          |                                                       |          |
| Sex (male reference)                                        | 1.016                                                          | (0.760, 1.357)  |                                          |                                                       |          |
| Length-for-age z-score                                      | 0.984                                                          | (0.869, 1.113)  |                                          |                                                       |          |
| Weight-for-length z-score                                   | 1.229                                                          | (1.056, 1.431)* |                                          |                                                       |          |
| Asset score                                                 | 0.893                                                          | (0.760, 1.047)  |                                          |                                                       |          |
| Distance to health facility (km)                            | 1.072                                                          | (0.963, 1.188)  |                                          |                                                       |          |
| Elevation (m)                                               | 0.995                                                          | (0.990, 1.001)  |                                          |                                                       |          |
| Baseline infection status                                   | 1.887                                                          | (1.384, 2.576)* |                                          |                                                       |          |
| Baseline iron status                                        | 1.051                                                          | (0.938, 1.179)  |                                          |                                                       |          |
| <b>Outcome 2: Inflammation without parasitaemia (n=894)</b> |                                                                |                 |                                          |                                                       |          |
| Intercept                                                   | 0.219                                                          | (0.109, 0.426)* | 9.458                                    | 0.442                                                 | 0.007    |
| Age per month                                               |                                                                |                 | (2.389,                                  | (0.206,                                               | (0.004,  |
| 6-23 months                                                 | 1.011                                                          | (0.971, 1.052)  | 23.57)                                   | 0.965)                                                | 0.029)   |
| 24-35 months                                                | 0.920                                                          | (0.843, 0.996)* |                                          |                                                       |          |
| Sex (male reference)                                        | 1.001                                                          | (0.671, 1.493)  |                                          |                                                       |          |
| Length-for-age z-score                                      | 1.153                                                          | (0.977, 1.360)  |                                          |                                                       |          |
| Weight-for-length z-score                                   | 1.302                                                          | (1.058, 1.603)* |                                          |                                                       |          |
| Asset score                                                 | 0.872                                                          | (0.705, 1.075)  |                                          |                                                       |          |
| Distance to health facility (km)                            | 1.065                                                          | (0.953, 1.176)  |                                          |                                                       |          |
| Elevation (m)                                               | 0.997                                                          | (0.991, 1.003)  |                                          |                                                       |          |
| Baseline infection status                                   | 1.034                                                          | (0.556, 1.813)  |                                          |                                                       |          |
| Baseline iron status                                        | 1.003                                                          | (0.841, 1.166)  |                                          |                                                       |          |
| <b>Outcome 3: Parasitaemia with fever (n=979)</b>           |                                                                |                 |                                          |                                                       |          |
| Intercept                                                   | 0.003                                                          | (0.002, 0.004)* | 7.690                                    | 0.448                                                 | 0.007    |
| Age per month                                               |                                                                |                 | (2.821,                                  | (0.243,                                               | (0.004,  |
| 6-23 months                                                 | 1.001                                                          | (0.979, 1.023)  | 18.01)                                   | 0.858)                                                | 0.028)   |
| 24-35 months                                                | 0.970                                                          | (0.927, 1.013)  |                                          |                                                       |          |
| Sex (male reference)                                        | 0.896                                                          | (0.718, 1.116)  |                                          |                                                       |          |
| Length-for-age z-score                                      | 1.009                                                          | (0.919, 1.107)  |                                          |                                                       |          |
| Weight-for-length z-score                                   | 0.896                                                          | (0.797, 1.007)  |                                          |                                                       |          |
| Asset score                                                 | 1.075                                                          | (0.947, 1.220)  |                                          |                                                       |          |
| Distance to health facility (km)                            | 1.047                                                          | (0.959, 1.142)  |                                          |                                                       |          |

|                           |       |                |
|---------------------------|-------|----------------|
| Elevation (m)             | 0.998 | (0.993, 1.003) |
| Baseline infection status | 0.757 | (0.467, 1.161) |
| Baseline iron status      | 1.040 | (0.953, 1.125) |

#### Outcome 4: All parasitaemia (n=894)

|                                  |       |                 |         |         |         |
|----------------------------------|-------|-----------------|---------|---------|---------|
| Intercept                        | 0.186 | (0.089, 0.400)* | 6.535   | 0.652   | 0.008   |
| Age per month                    |       |                 | (2.037, | (0.344, | (0.004, |
| 6-23 months                      | 0.974 | (0.936, 1.014)  | 15.08)  | 1.255)  | 0.029)  |
| 24-35 months                     | 1.067 | (1.026, 1.110)* |         |         |         |
| Sex (male reference)             | 1.050 | (0.756, 1.459)  |         |         |         |
| Length-for-age z-score           | 0.901 | (0.780, 1.037)  |         |         |         |
| Weight-for-length z-score        | 1.095 | (0.923, 1.298)  |         |         |         |
| Asset score                      | 0.941 | (0.781, 1.130)  |         |         |         |
| Distance to health facility (km) | 1.023 | (0.896, 1.165)  |         |         |         |
| Elevation (m)                    | 0.996 | (0.989, 1.004)  |         |         |         |
| Baseline infection status        | 2.864 | (1.968, 4.172)* |         |         |         |
| Baseline iron status             | 1.036 | (0.914, 1.169)  |         |         |         |

<sup>1</sup>Infection status definitions:

Outcome 1: Inflammation and/or parasitaemia (binary): 1 = CRP > 5 mg/L and/or any malaria parasitaemia, 0 = CRP ≤ 5 mg/L and absence of parasitaemia;

Outcome 2: Inflammation without parasitaemia (binary): 1 = CRP > 5 mg/L without malaria parasitaemia, 0 = CRP ≤ 5 mg/L without parasitaemia;

Outcome 3: Parasitaemia with fever (count): any malaria parasitaemia with concurrent fever (axillary temperature >37.5°C) or history of reported fever (within 48 hours);

Outcome 4: All parasitaemia (binary): 1 = any malaria parasitaemia (with/without fever), 0 = absence of parasitaemia with/without fever

Model prior shape = 1.117, model prior rate = 0.157

<sup>2</sup>Exponentials of posterior medians and 2.5% and 97.5% posterior quantiles of model parameters, with a value of 1.05 indicating that a variable increases the risk of infection by 5% (odds ratio from logistic model for all binary outcomes; relative risk from Poisson model for count outcome)

CrI = credible interval

Baseline infection status = baseline infection status (yes/no) according to corresponding definition

Baseline iron status = baseline serum ferritin concentration (µg/dL) corrected for CRP using the regression method (Namaste et al.) and re-scaled by multiplying by the inverse of the inter-quartile range

\*Statistical significance at the 0.05 level
