# Supplementary material for: Impact of iron fortification on the geospatial patterns of malaria and non-malaria infection risk among young children: a secondary spatial analysis of clinical trial data from Ghana
Source: PubMed Central journal article supplement — BMJ Open. 2017 Jun 6;7(5):e013192. doi: 10.1136/bmjopen-2016-013192 (PMC5734205; doi:10.1136/bmjopen-2016-013192), 2017-06-06
Supplement: bmjopen-2016-013192supp003.pdf [file bmjopen-2016-013192supp003.pdf]

**Table S2: Geo-spatial and non-spatial risk factors of endline infection status<sup>1</sup> among Ghanaian children in the *Iron* group (Brong-Ahafo Region, Sept-Nov 2010)**

| Covariates                                                  | Estimate (95% CrI)<br>on the exponential<br>scale <sup>2</sup> |                 | Range<br>parameter<br>in km<br>(95% CrI) | Standard deviations<br>of random effects<br>(95% CrI) |          |
|-------------------------------------------------------------|----------------------------------------------------------------|-----------------|------------------------------------------|-------------------------------------------------------|----------|
|                                                             |                                                                |                 |                                          | Spatial                                               | Compound |
| <b>Outcome 1: Inflammation and/or parasitaemia (n=886)</b>  |                                                                |                 |                                          |                                                       |          |
| Intercept                                                   | 0.647                                                          | (0.354, 1.263)  | 7.761                                    | 0.487                                                 | 0.007    |
| Age per month                                               |                                                                |                 | (2.682,                                  | (0.263,                                               | (0.004,  |
| 6-23 months                                                 | 1.004                                                          | (0.975, 1.035)  | 17.96)                                   | 0.931)                                                | 0.028)   |
| 24-35 months                                                | 0.977                                                          | (0.925, 1.031)  |                                          |                                                       |          |
| Sex (male reference)                                        | 1.162                                                          | (0.871, 1.551)  |                                          |                                                       |          |
| Length-for-age z-score                                      | 0.980                                                          | (0.857, 1.119)  |                                          |                                                       |          |
| Weight-for-length z-score                                   | 0.971                                                          | (0.833, 1.130)  |                                          |                                                       |          |
| Asset score                                                 | 0.906                                                          | (0.769, 1.064)  |                                          |                                                       |          |
| Distance to health facility (km)                            | 1.003                                                          | (0.904, 1.106)  |                                          |                                                       |          |
| Elevation (m)                                               | 0.995                                                          | (0.989, 1.001)  |                                          |                                                       |          |
| Baseline infection status                                   | 2.272                                                          | (1.664, 3.108)* |                                          |                                                       |          |
| Baseline iron status                                        | 1.053                                                          | (0.953, 1.172)  |                                          |                                                       |          |
| <b>Outcome 2: Inflammation without parasitaemia (n=886)</b> |                                                                |                 |                                          |                                                       |          |
| Intercept                                                   | 0.143                                                          | (0.073, 0.274)* | 12.56                                    | 0.428                                                 | 0.007    |
| Age per month                                               |                                                                |                 | (4.318,                                  | (0.203,                                               | (0.004,  |
| 6-23 months                                                 | 1.007                                                          | (0.969, 1.048)  | 27.27)                                   | 0.923)                                                | 0.028)   |
| 24-35 months                                                | 0.983                                                          | (0.910, 1.056)  |                                          |                                                       |          |
| Sex (male reference)                                        | 1.330                                                          | (0.905, 1.962)  |                                          |                                                       |          |
| Length-for-age z-score                                      | 1.054                                                          | (0.884, 1.255)  |                                          |                                                       |          |
| Weight-for-length z-score                                   | 0.890                                                          | (0.726, 1.090)  |                                          |                                                       |          |
| Asset score                                                 | 0.888                                                          | (0.725, 1.087)  |                                          |                                                       |          |
| Distance to health facility (km)                            | 0.984                                                          | (0.883, 1.080)  |                                          |                                                       |          |
| Elevation (m)                                               | 1.001                                                          | (0.995, 1.006)  |                                          |                                                       |          |
| Baseline infection status                                   | 1.508                                                          | (0.897, 2.459)  |                                          |                                                       |          |
| Baseline iron status                                        | 1.044                                                          | (0.918, 1.166)  |                                          |                                                       |          |
| <b>Outcome 3: Parasitaemia with fever (n=960)</b>           |                                                                |                 |                                          |                                                       |          |
| Intercept                                                   | 0.002                                                          | (0.001, 0.004)* | 8.352                                    | 0.466                                                 | 0.007    |
| Age per month                                               |                                                                |                 | (3.203,                                  | (0.244,                                               | (0.004,  |
| 6-23 months                                                 | 1.017                                                          | (0.992, 1.043)  | 17.99)                                   | 0.896)                                                | 0.028)   |
| 24-35 months                                                | 0.987                                                          | (0.945, 1.029)  |                                          |                                                       |          |
| Sex (male reference)                                        | 0.991                                                          | (0.780, 1.257)  |                                          |                                                       |          |
| Length-for-age z-score                                      | 0.969                                                          | (0.867, 1.082)  |                                          |                                                       |          |
| Weight-for-length z-score                                   | 1.052                                                          | (0.925, 1.197)  |                                          |                                                       |          |
| Asset score                                                 | 1.002                                                          | (0.872, 1.152)  |                                          |                                                       |          |
| Distance to health facility (km)                            | 1.064                                                          | (0.970, 1.163)  |                                          |                                                       |          |
| Elevation (m)                                               | 0.998                                                          | (0.993, 1.003)  |                                          |                                                       |          |

|                           |       |                |
|---------------------------|-------|----------------|
| Baseline infection status | 0.849 | (0.516, 1.321) |
| Baseline iron status      | 0.981 | (0.895, 1.060) |

**Outcome 4: All parasitaemia (n=886)**

|                                  |       |                 |         |         |         |
|----------------------------------|-------|-----------------|---------|---------|---------|
| Intercept                        | 0.412 | (0.199, 0.938)* | 7.293   | 0.666   | 0.008   |
| Age per month                    |       |                 | (2.486, | (0.376, | (0.004, |
| 6-23 months                      | 1.015 | (0.975, 1.056)  | 17.67)  | 1.230)  | 0.030)  |
| 24-35 months                     | 0.977 | (0.938, 1.016)  |         |         |         |
| Sex (male reference)             | 0.977 | (0.707, 1.347)  |         |         |         |
| Length-for-age z-score           | 0.946 | (0.812, 1.098)  |         |         |         |
| Weight-for-length z-score        | 1.034 | (0.872, 1.225)  |         |         |         |
| Asset score                      | 0.946 | (0.785, 1.137)  |         |         |         |
| Distance to health facility (km) | 1.009 | (0.889, 1.149)  |         |         |         |
| Elevation (m)                    | 0.994 | (0.987, 1.001)  |         |         |         |
| Baseline infection status        | 2.597 | (1.791, 3.768)* |         |         |         |
| Baseline iron status             | 1.042 | (0.939, 1.153)  |         |         |         |

<sup>1</sup>Infection status definitions:

Outcome 1: Inflammation and/or parasitaemia (binary): 1 = CRP > 5 mg/L and/or any malaria parasitaemia, 0 = CRP ≤ 5 mg/L and absence of parasitaemia;

Outcome2: Inflammation without parasitaemia (binary): 1 = CRP > 5 mg/L without malaria parasitaemia, 0 = CRP ≤ 5 mg/L without parasitaemia;

Outcome3: Parasitaemia with fever (count): any malaria parasitaemia with concurrent fever (axillary temperature >37.5°C) or history of reported fever (within 48 hours);

Outcome4: All parasitaemia (binary): 1 = any malaria parasitaemia (with/without fever), 0 = absence of parasitaemia with/without fever

Model prior shape = 1.117, model prior rate = 0.157

<sup>2</sup>Exponentials of posterior medians and 2.5% and 97.5% posterior quantiles of model parameters, with a value of 1.05 indicating that a variable increases the risk of infection by 5% (odds ratio from logistic model for all binary outcomes; relative risk from Poisson model for count outcome)

CrI = credible interval

Baseline infection status = baseline infection status (yes/no) according to corresponding definition

Baseline iron status = baseline ferritin concentration (µg/dL) corrected for CRP using the regression method (Namaste et al.) and re-scaled by multiplying by the inverse of the inter-quartile range

\*Statistical significance at the 0.05 level
